# Supplementary figures and images for: Enabling a robust scalable manufacturing process for therapeutic exosomes through oncogenic immortalization of human ESC-derived MSCs
Source: Springer Nature journal article supplement (doi:10.1186/1479-5876-9-47), 2011-04-25

a)

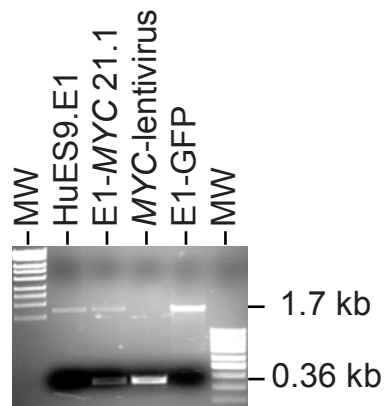

b)

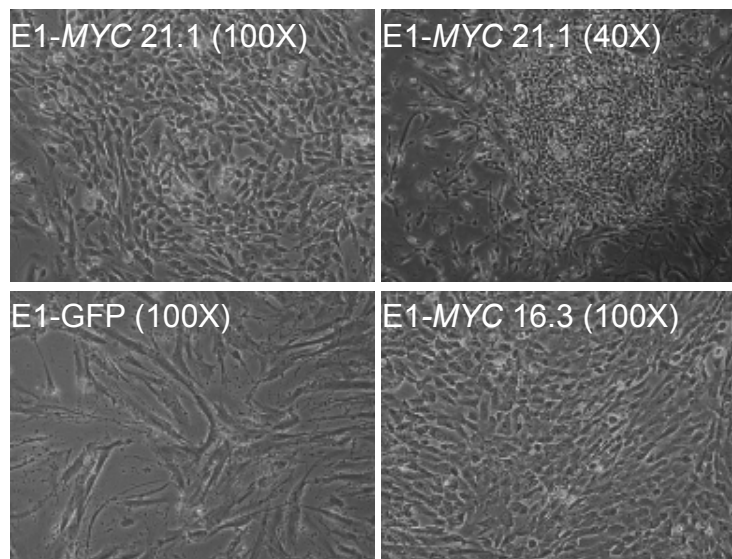

c)

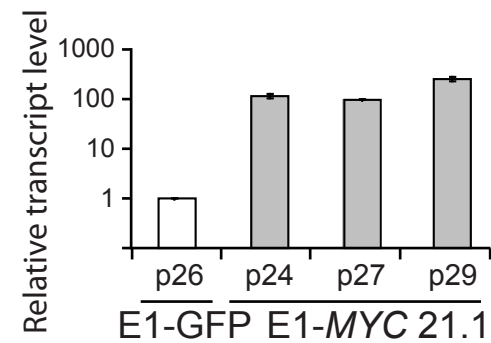

d)

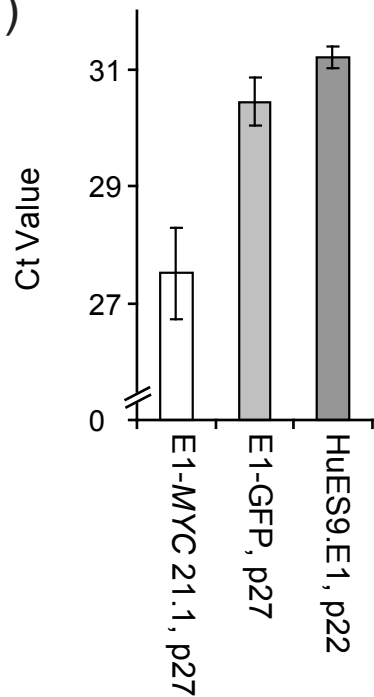

e)

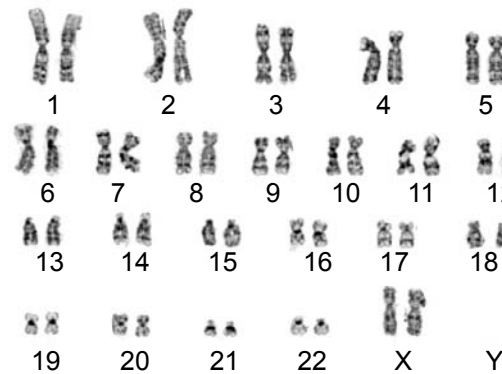

f)

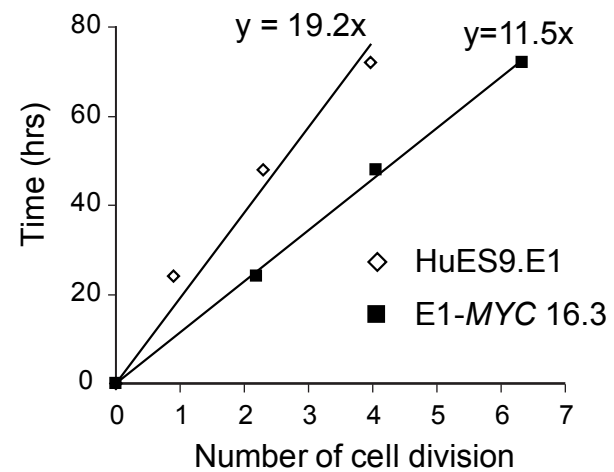

Supplement: 12967_2010_713_MOESM1_ESM.pdf [file 12967_2010_713_MOESM1_ESM.pdf]

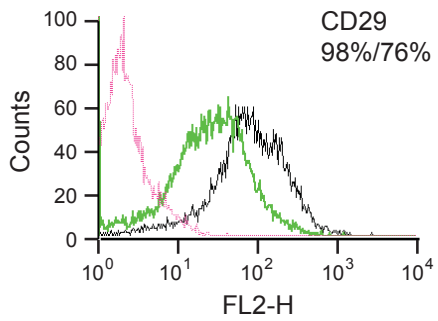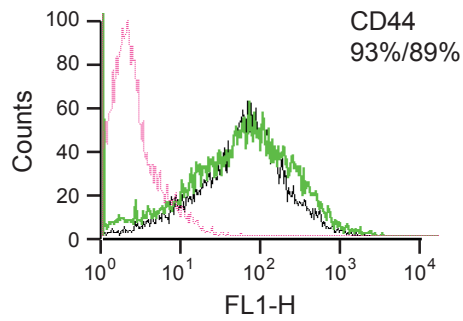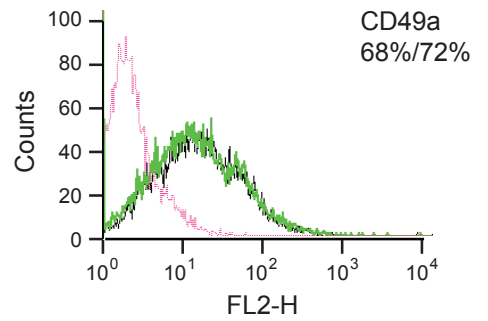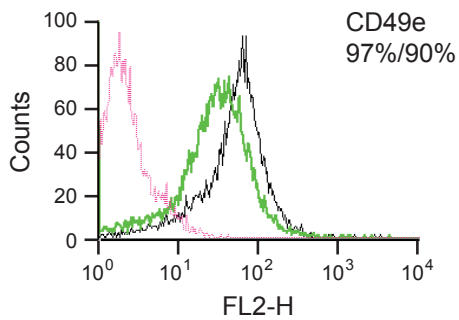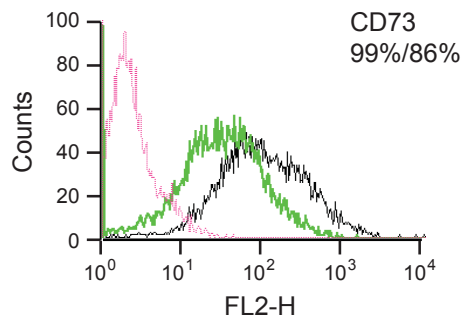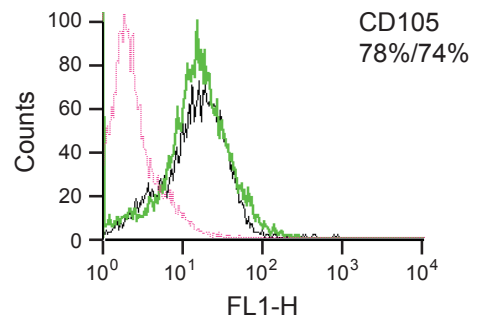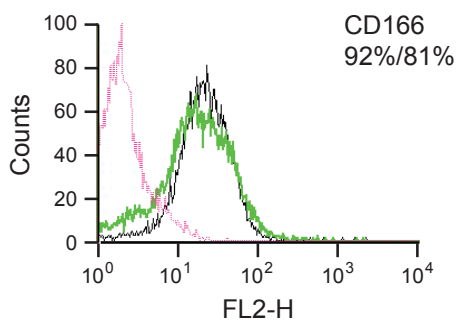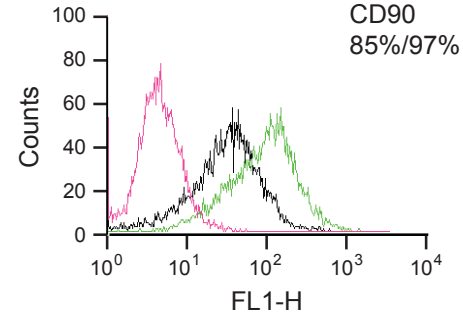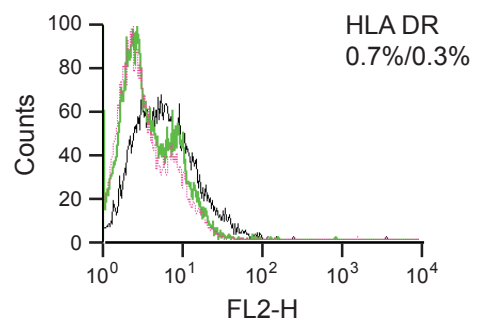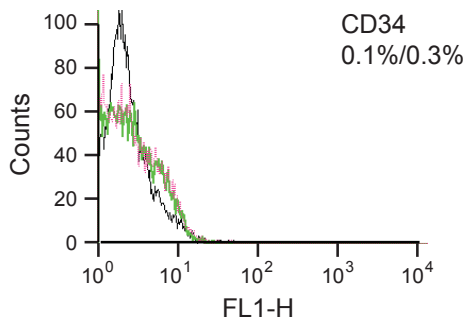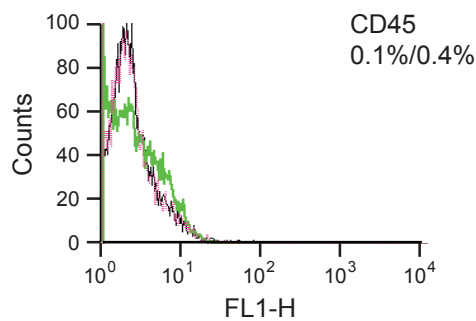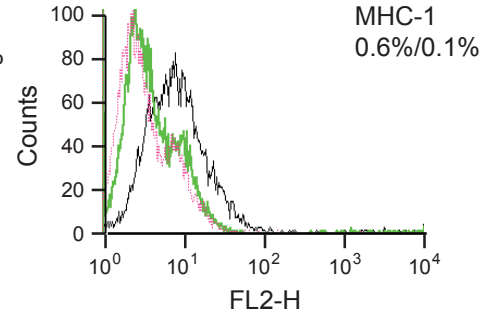

— PE/FITC control  
— HuES9.E1 MSCs  
— E1-MYC 16.3 MSCs

Supplement: 12967_2010_713_MOESM2_ESM.pdf [file 12967_2010_713_MOESM2_ESM.pdf]

## a) Osteogenesis

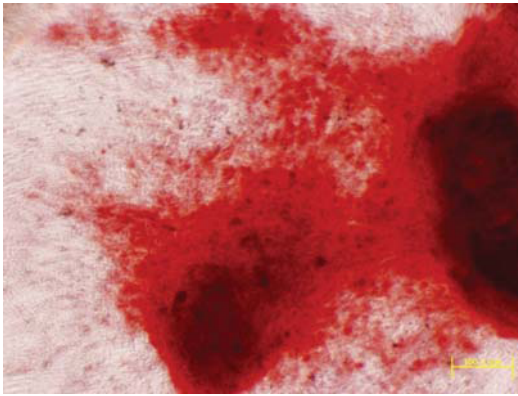

E1-MYC 16.3

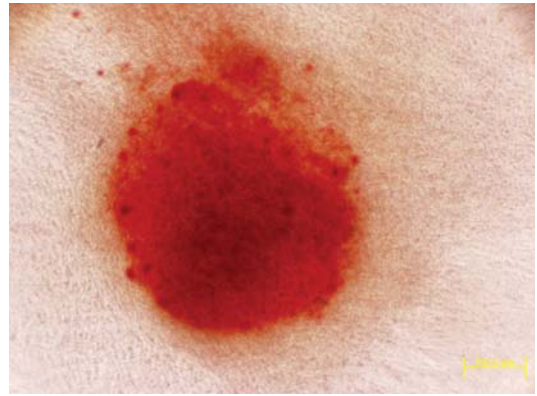

HuES9.E1

## b) Chondrogenesis

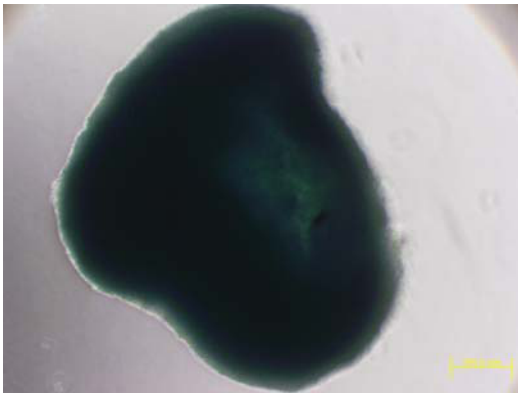

E1-MYC 16.3

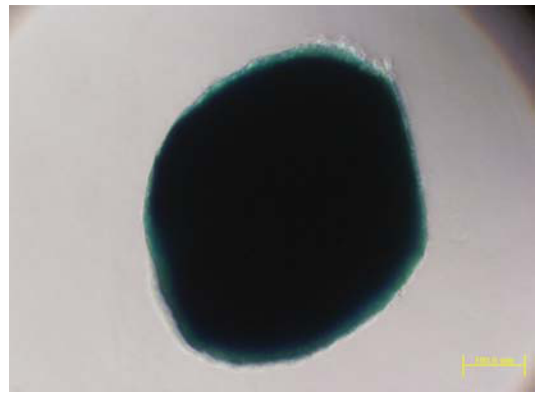

HuES9.E1

## c) Adipogenesis

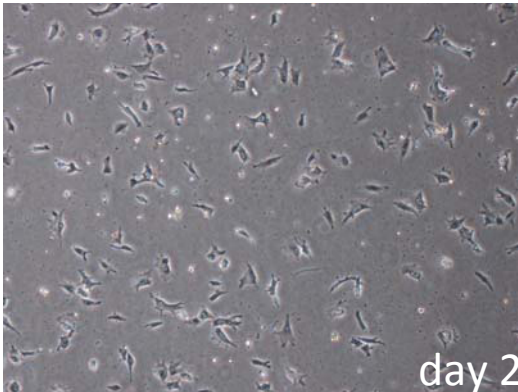

E1-MYC 16.3

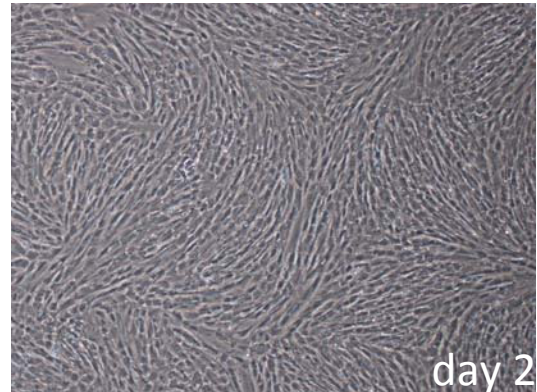

HuES9.E1

Supplement: 12967_2010_713_MOESM3_ESM.pdf [file 12967_2010_713_MOESM3_ESM.pdf]

a)

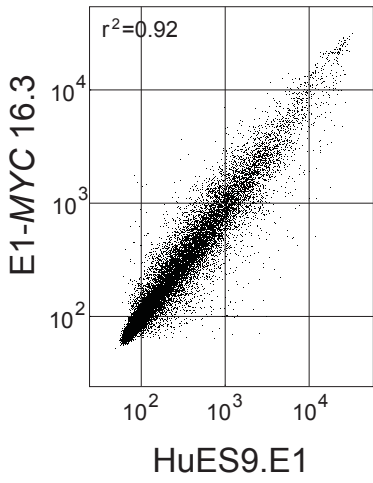

b)

### Upregulated genes

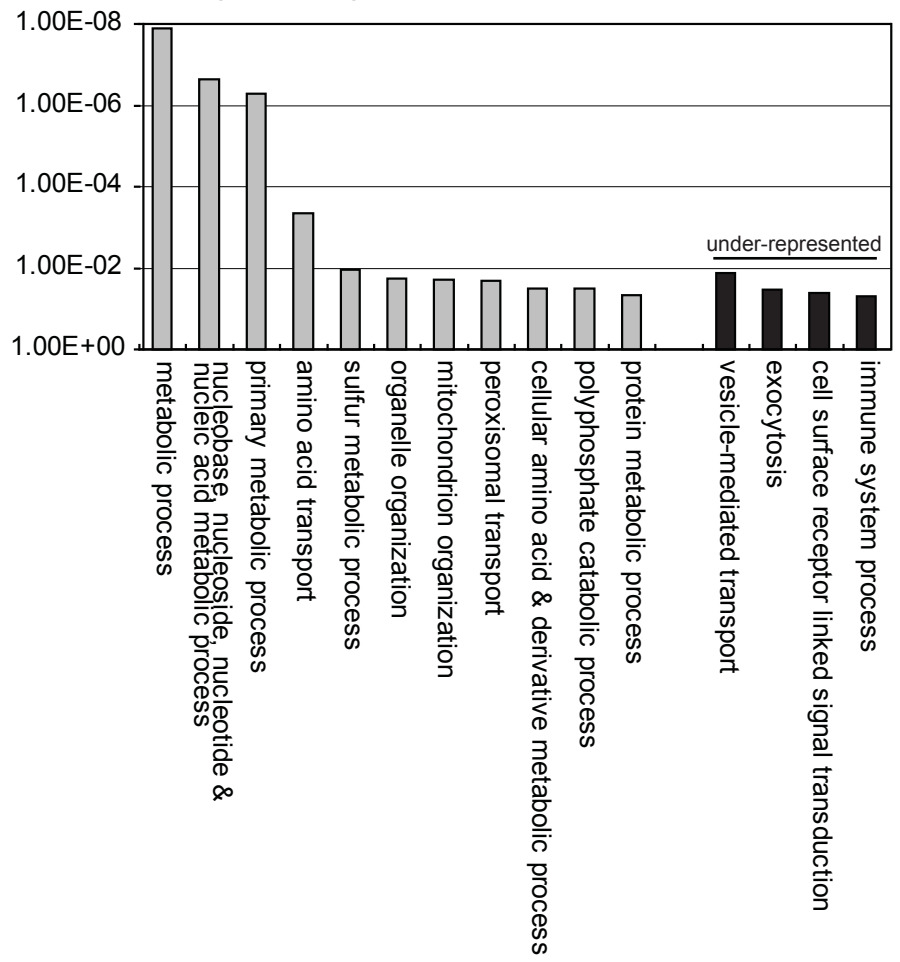

c)

### Downregulated genes

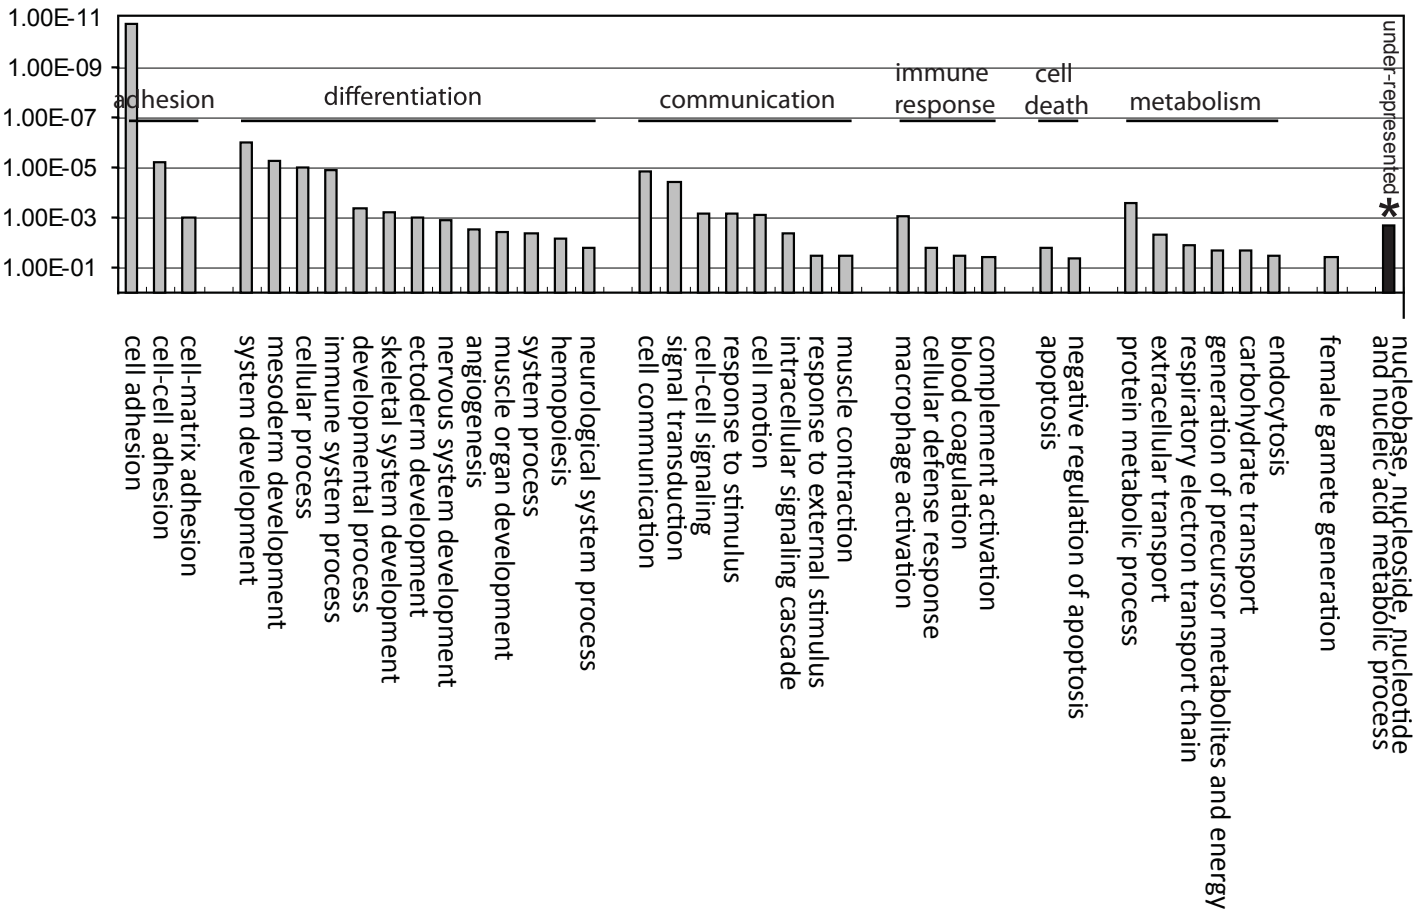

Supplement: 12967_2010_713_MOESM4_ESM.pdf [file 12967_2010_713_MOESM4_ESM.pdf]
